# Supplementary material for: STAT3 signaling stimulates miR-21 expression in bovine cumulus cells during in vitro oocyte maturation
Source: PubMed Central journal article supplement (PMC6070548; doi:10.1038/s41598-018-29874-w), 2018-08-01
Supplement: 41598_2018_29874_MOESM1_ESM.pdf [file 41598_2018_29874_MOESM1_ESM.pdf]

**Supplemental Data to:**

**STAT3 signaling stimulates miR-21 expression in bovine cumulus cells during *in vitro* oocyte maturation**

Allison Tschner (tschner@uoguelph.ca)<sup>1</sup>

Alyssa Brown (abrown49@uoguelph.ca)<sup>1</sup>

Leanne Stalker (stalkerl@uoguelph.ca)<sup>1</sup>

Jennifer Kao ([jenn.kao@mail.utoronto.ca](mailto:jenn.kao@mail.utoronto.ca))<sup>1</sup>

Isabelle Dufort ([isabelle.dufort@fsaa.ulaval.ca](mailto:isabelle.dufort@fsaa.ulaval.ca))<sup>2</sup>

Marc-André Sirard ([Marc-Andre.Sirard@fsaa.ulaval.ca](mailto:Marc-Andre.Sirard@fsaa.ulaval.ca))<sup>2</sup>

Jonathan LaMarre (jlamarre@uoguelph.ca)<sup>1\*</sup>

## Supplemental Figure 1

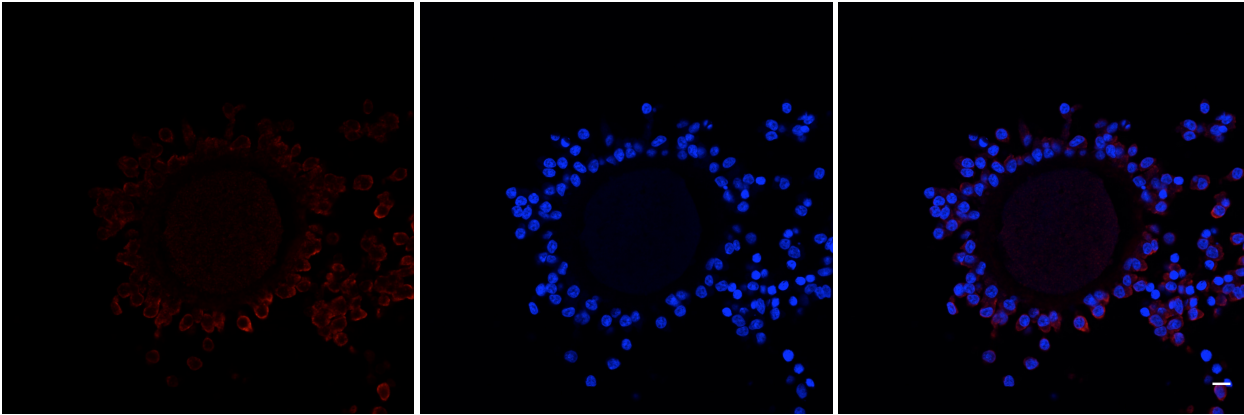

**Supplemental Figure 1: RNA in situ hybridization of mature COC.** Left panel: scrambled RNA probe, center panel: nuclei stained with DAPI, right panel: merged image. Scale bar represents 10 $\mu$ m.

**Supplemental Figure 2**

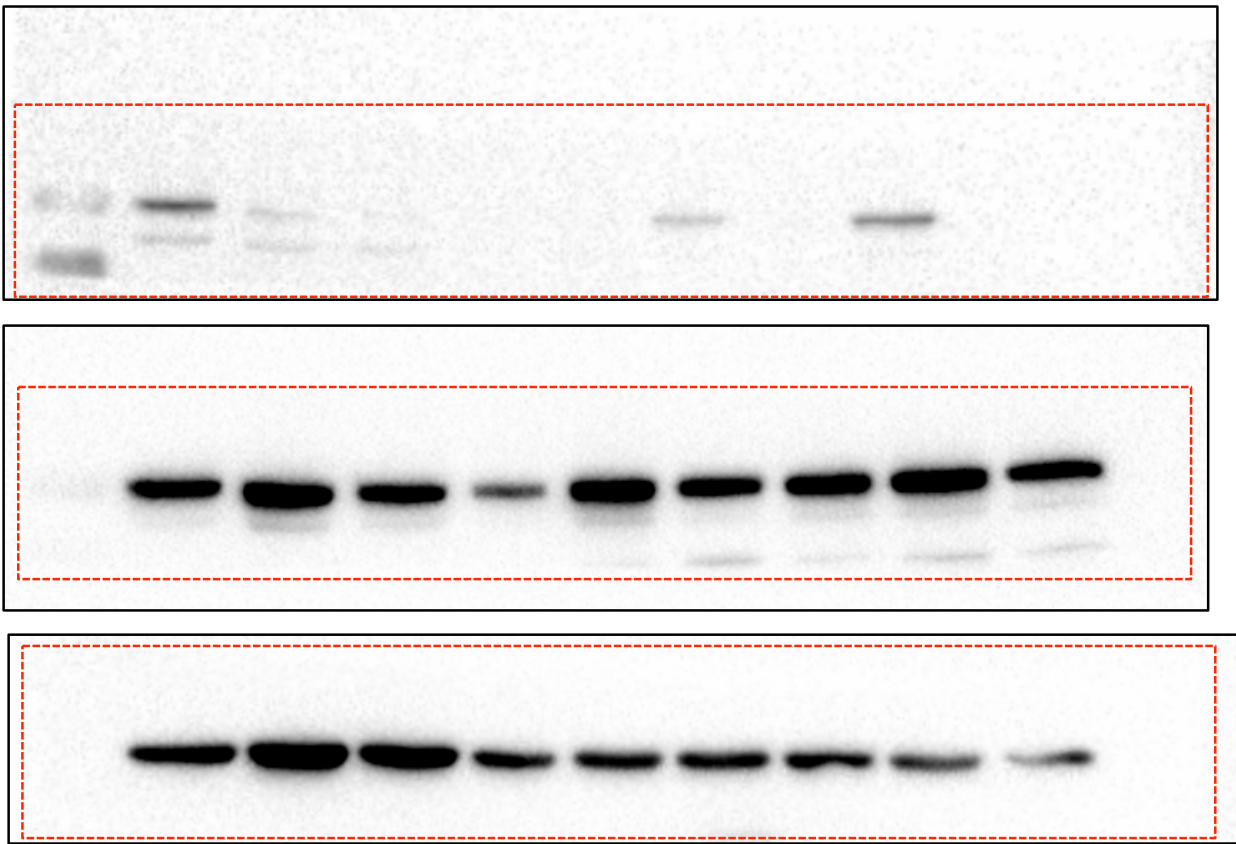

**Supplemental Figure 2: Representative Western blot of STAT3 phosphorylation (Y705) and inhibition by Stattic in cumulus cells from 0-8hr IVM.** Full-length blots corresponding to the cropped images presented in the main text, Figure 4. Red hatched lines delineate the approximate boundaries of the original membrane.

**Supplemental Figure 3**

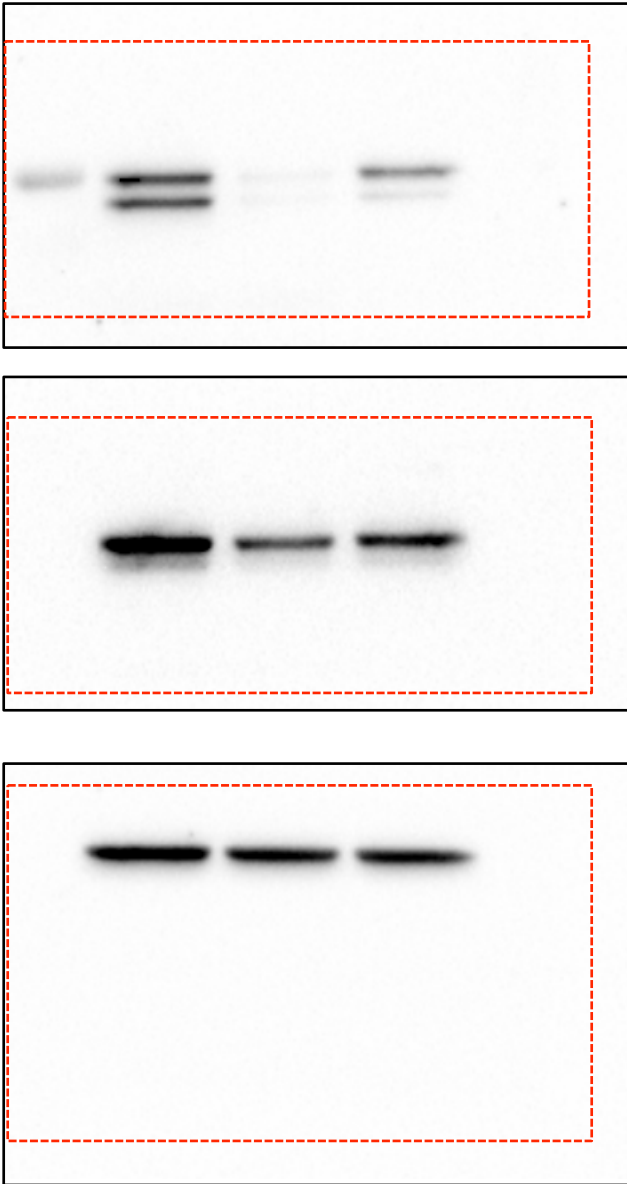

**Supplemental Figure 3: Representative Western blot of STAT3 phosphorylation (Y705) in cumulus cells at 7hr IVM, in serum free, non-supplemented media containing vehicle (ethanol), cycloheximide (CHX) or CHX+LIF. Full-length blots corresponding to the cropped images presented in the main text, Figure 5. Red hatched lines delineate the approximate boundaries of the original membrane.**

**Supplemental Table 1: Transcription factors predicted to bind miPPR-21 on plus strand**

| TF          | <i>Bos taurus</i> |        |      |         |        | Seq1              | <i>Homo sapiens</i> |                   |        |        |         | Seq2              |
|-------------|-------------------|--------|------|---------|--------|-------------------|---------------------|-------------------|--------|--------|---------|-------------------|
|             | Position (TSS=+1) | Start1 | End1 | Strand1 | Score1 |                   | %Score1             | Position (TSS=+1) | Start2 | End2   | Strand2 |                   |
| HNF4A       | -306              | -294   | +    | 8.096   | 80.7   | GATTC AAGGTCA     | -305                | -293              | +      | 10.627 | 86.8    | GATTC AAGGTCA     |
| ARID3A      | -305              | -300   | +    | 5.399   | 82.7   | ATTC A A          | -304                | -299              | +      | 5.399  | 82.7    | ATTC A A          |
| HNF4A       | -299              | -287   | +    | 8.42    | 81.5   | GGTTC ATAGTCC     | -298                | -286              | +      | 8.468  | 81.6    | AGTTC ATAGTCC     |
| ELF5        | -293              | -285   | +    | 9.888   | 94.4   | TAGTTCCTT         | -292                | -284              | +      | 9.888  | 94.4    | TAGTTCCTT         |
| Sox17       | -286              | -278   | +    | 6.176   | 82.3   | TTCTTTGTT         | -285                | -277              | +      | 6.176  | 82.3    | TTCTTTGTT         |
| ELF5        | -282              | -274   | +    | 7.685   | 87.2   | TTGTTCCTT         | -281                | -273              | +      | 7.685  | 87.2    | TTGTTCCTT         |
| NFATC2      | -281              | -275   | +    | 6.724   | 82.9   | TGTTCCCT          | -280                | -274              | +      | 6.724  | 82.9    | TGTTCCCT          |
| Sox17       | -278              | -270   | +    | 5.776   | 81     | TCCTTTGTT         | -277                | -269              | +      | 5.776  | 81      | TCCTTTGTT         |
| Sox2        | -277              | -263   | +    | 10.246  | 81.6   | CCTTTGTAATCACT    | -276                | -262              | +      | 10.246 | 81.6    | CCTTTGTAATCACT    |
| HNF1A       | -273              | -260   | +    | 9.304   | 80.2   | TGTTAATCACTGAC    | -272                | -259              | +      | 9.304  | 80.2    | TGTTAATCACTGAC    |
| AP1         | -271              | -265   | +    | 7.573   | 88.7   | TTAATCA           | -270                | -264              | +      | 7.573  | 88.7    | TTAATCA           |
| Gfi         | -271              | -262   | +    | 9.241   | 90     | TTAATCACTG        | -270                | -261              | +      | 9.241  | 90      | TTAATCACTG        |
| Nkx2-5      | -271              | -265   | +    | 5.339   | 84     | TTAATCA           | -270                | -264              | +      | 5.339  | 84      | TTAATCA           |
| Pdx1        | -271              | -266   | +    | 5.014   | 81.3   | TTAATC            | -270                | -265              | +      | 5.014  | 81.3    | TTAATC            |
| Nobox       | -270              | -263   | +    | 5.881   | 81.9   | TAATCACT          | -269                | -262              | +      | 5.881  | 81.9    | TAATCACT          |
| CREB1       | -263              | -256   | +    | 6.22    | 80.4   | TGACTTCT          | -262                | -255              | +      | 6.22   | 80.4    | TGACTTCT          |
| HIF1A::ARNT | -247              | -240   | +    | 5.827   | 84     | GGAGGTGC          | -246                | -239              | +      | 5.827  | 84      | GGAGGTGC          |
| HOXA5       | -229              | -222   | +    | 5.112   | 83.3   | TGCTAATG          | -228                | -221              | +      | 5.112  | 83.3    | TGCTAATG          |
| Pdx1        | -227              | -222   | +    | 8.73    | 96.5   | CTAATG            | -226                | -221              | +      | 8.73   | 96.5    | CTAATG            |
| Gata1       | -213              | -203   | +    | 4.964   | 82.4   | TTGGATAAGGA       | -212                | -202              | +      | 4.964  | 82.4    | TTGGATAAGGA       |
| AP1         | -202              | -196   | +    | 7.794   | 89.5   | TGACGCA           | -201                | -195              | +      | 7.794  | 89.5    | TGACGCA           |
| NR3C1       | -200              | -183   | +    | 8.953   | 80.9   | ACGCACAGATTGCCTAA | -199                | -182              | +      | 8.953  | 80.9    | ACGCACAGATTGCCTAA |
| HOXA5       | -197              | -190   | +    | 5.427   | 84.4   | CACAGATT          | -196                | -189              | +      | 5.427  | 84.4    | CACAGATT          |
| Sox17       | -195              | -187   | +    | 8.241   | 89     | CAGATTGTC         | -194                | -186              | +      | 8.241  | 89      | CAGATTGTC         |
| SRF         | -189              | -178   | +    | 11.428  | 84     | GTCCTAATAAGG      | -188                | -177              | +      | 11.428 | 84      | GTCCTAATAAGG      |
| Gata1       | -187              | -177   | +    | 3.954   | 80.6   | CCTAATAAGGA       | -186                | -176              | +      | 3.954  | 80.6    | CCTAATAAGGA       |
| Pdx1        | -186              | -181   | +    | 6.478   | 87.3   | CTAATA            | -185                | -180              | +      | 6.478  | 87.3    | CTAATA            |
| Nobox       | -185              | -178   | +    | 6.312   | 83.3   | TAATAAGG          | -184                | -177              | +      | 6.312  | 83.3    | TAATAAGG          |
| Gata1       | -171              | -161   | +    | 4.475   | 81.5   | ATTGAGAAAGG       | -170                | -160              | +      | 4.906  | 82.3    | ATTGAGAAAGG       |
| SPIB        | -169              | -163   | +    | 5.592   | 83.3   | TGAGAAA           | -168                | -162              | +      | 5.592  | 83.3    | TGAGAAA           |
| Gata1       | -151              | -141   | +    | 6.204   | 84.7   | TCTGAGAAAGAT      | -151                | -141              | +      | 7.096  | 86.3    | TCTGAGAAAGAG      |
| Nkx2-5      | -137              | -131   | +    | 4.492   | 80.6   | ACAAGTC           | -137                | -131              | +      | 4.492  | 80.6    | ACAAGTC           |
| Gfi         | -136              | -127   | +    | 6.451   | 81.6   | CAAGTCAGTG        | -136                | -127              | +      | 6.318  | 81.2    | CAAGTCAGAG        |
| Gata1       | -130              | -120   | +    | 3.927   | 80.5   | AGTGAGAGGGCA      | -130                | -120              | +      | 5.157  | 82.8    | AGAGAGAGGGCA      |
| Klf4        | -124              | -115   | +    | 6.983   | 85.5   | AGGGCGGGCA        | -124                | -115              | +      | 6.983  | 85.5    | AGGGCGGGCA        |
| Myb         | -118              | -111   | +    | 7.335   | 87.2   | GGCAGTTT          | -118                | -111              | +      | 7.335  | 87.2    | GGCAGTTT          |
| HLF         | -96               | -85    | +    | 7.924   | 83.2   | GATGACACAAGC      | -96                 | -85               | +      | 7.924  | 83.2    | GATGACACAAGC      |
| AP1         | -94               | -88    | +    | 8.773   | 93.1   | TGACACA           | -94                 | -88               | +      | 8.773  | 93.1    | TGACACA           |
| CEBPA       | -94               | -86    | +    | 6.201   | 81.9   | TGACACAAG         | -94                 | -86               | +      | 6.201  | 81.9    | TGACACAAG         |
| CREB1       | -94               | -87    | +    | 6.329   | 80.8   | TGACACAA          | -94                 | -87               | +      | 6.329  | 80.8    | TGACACAA          |
| Nr2e3       | -89               | -83    | +    | 7.33    | 84.5   | CAAGCAT           | -89                 | -83               | +      | 7.33   | 84.5    | CAAGCAT           |
| Nkx2-5      | -84               | -78    | +    | 5.972   | 86.5   | ATAAGTC           | -84                 | -78               | +      | 5.972  | 86.5    | ATAAGTC           |
| ELF5        | -78               | -70    | +    | 10.352  | 96     | CATTTCCTT         | -78                 | -70               | +      | 10.352 | 96      | CATTTCCTT         |
| NFATC2      | -77               | -71    | +    | 7.175   | 84.6   | ATTTCTT           | -77                 | -71               | +      | 7.175  | 84.6    | ATTTCTT           |
| Pdx1        | -72               | -67    | +    | 5.029   | 81.3   | CTTATT            | -72                 | -67               | +      | 5.029  | 81.3    | CTTATT            |
| Nobox       | -71               | -64    | +    | 5.629   | 81.1   | TTATTAAT          | -71                 | -64               | +      | 5.629  | 81.1    | TTATTAAT          |
| Prrx2       | -70               | -66    | +    | 4.918   | 82.6   | TATTA             | -70                 | -66               | +      | 4.918  | 82.6    | TATTA             |
| ARID3A      | -69               | -64    | +    | 8.299   | 94     | ATTAAT            | -69                 | -64               | +      | 8.299  | 94      | ATTAAT            |
| Nkx2-5      | -68               | -62    | +    | 7.328   | 92     | TTAATCG           | -68                 | -62               | +      | 9.317  | 100     | TTAATTG           |
| Pdx1        | -68               | -63    | +    | 5.014   | 81.3   | TTAATC            | -68                 | -63               | +      | 8.106  | 94      | TTAATT            |
| Nobox       | -67               | -60    | +    | 6.919   | 85.3   | TAATCGGT          | -67                 | -60               | +      | 11.363 | 100     | TAATTGGT          |
| Tcfcp2l1    | -64               | -51    | +    | 11.265  | 89.6   | TCGGTTC A AACCAG  | -64                 | -51               | +      | 8.52   | 85.6    | TTGGTTC A AACCAG  |
| Tcfcp2l1    | -54               | -41    | +    | 9.483   | 87     | CCAGTCTTACAGG     | -54                 | -41               | +      | 10.401 | 88.3    | CCAGTCTTACAGG     |
| STAT1       | -50               | -36    | +    | 9.154   | 82.9   | TCCTTACAGGAAGTCTG | -50                 | -36               | +      | 8.978  | 82.7    | TTCTTACAGGAAGTCTG |
| Stat3       | -47               | -38    | +    | 9.082   | 85.5   | TTACAGGAAC        | -47                 | -38               | +      | 9.082  | 85.5    | TTACAGGAAC        |
| SPIB        | -45               | -39    | +    | 9.504   | 96.7   | ACAGGAA           | -45                 | -39               | +      | 9.504  | 96.7    | ACAGGAA           |
| FEV         | -44               | -37    | +    | 8.915   | 89     | CAGGAACCT         | -44                 | -37               | +      | 8.915  | 89      | CAGGAACCT         |
| GABPA       | -44               | -34    | +    | 7.913   | 84.5   | CAGGAACCTGGT      | -44                 | -34               | +      | 5.997  | 81.2    | CAGGAACCTAGT      |
| Myf         | -44               | -33    | +    | 12.077  | 91     | CAGGAACCTGGTG     | -44                 | -33               | +      | 7.989  | 81.6    | CAGGAACCTAGTG     |
| SPI1        | -43               | -37    | +    | 8.637   | 90.3   | AGGAACT           | -43                 | -37               | +      | 8.637  | 90.3    | AGGAACT           |
| MZF1_1-4    | -34               | -29    | +    | 5.838   | 85.2   | TGGTGA            | -34                 | -29               | +      | 5.838  | 85.2    | TGGTGA            |
| Gata1       | -33               | -23    | +    | 8.662   | 89.2   | GGTGATAAATG       | -33                 | -23               | +      | 8.662  | 89.2    | GGTGATAAATG       |
| HOXA5       | -30               | -23    | +    | 4.334   | 80.6   | GATAAATG          | -30                 | -23               | +      | 4.334  | 80.6    | GATAAATG          |
| ARID3A      | -29               | -24    | +    | 5.307   | 82.3   | ATAAAT            | -29                 | -24               | +      | 5.307  | 82.3    | ATAAAT            |
| Nkx2-5      | -29               | -23    | +    | 5.577   | 84.9   | ATAAATG           | -29                 | -23               | +      | 5.577  | 84.9    | ATAAATG           |
